# Supplementary material
Source: PubMed Central journal article supplement (PMC6641043)
Supplement: ao6b00399_si_001.pdf [file ao6b00399_si_001.pdf]

## SUPPORTING INFORMATION

### **Impact of Doping on GO: Fast Response–Recovery Humidity Sensor**

**Keerti Rathi<sup>a</sup> and Kaushik Pal<sup>a,b,\*</sup>**

*<sup>a</sup>Centre of Nanotechnology, Indian Institute of Technology Roorkee, Roorkee 247667, India*

*<sup>b</sup>Department of Mechanical and Industrial Engineering, Indian Institute of Technology Roorkee, Roorkee 247667, India*

\* Corresponding author.

**Kaushik Pal**

Tel.: +91-01332-284761;

Fax: +91-1332-285665/273560.

E-mail addresses: [pl\\_kshk@yahoo.co.in](mailto:pl_kshk@yahoo.co.in) (K. Pal).

| Serial No | Content                                 | Page numbers |
|-----------|-----------------------------------------|--------------|
| 1.        | Schematic synthesis process             | S2           |
| 2.        | Experimental setup for humidity sensing | S3           |

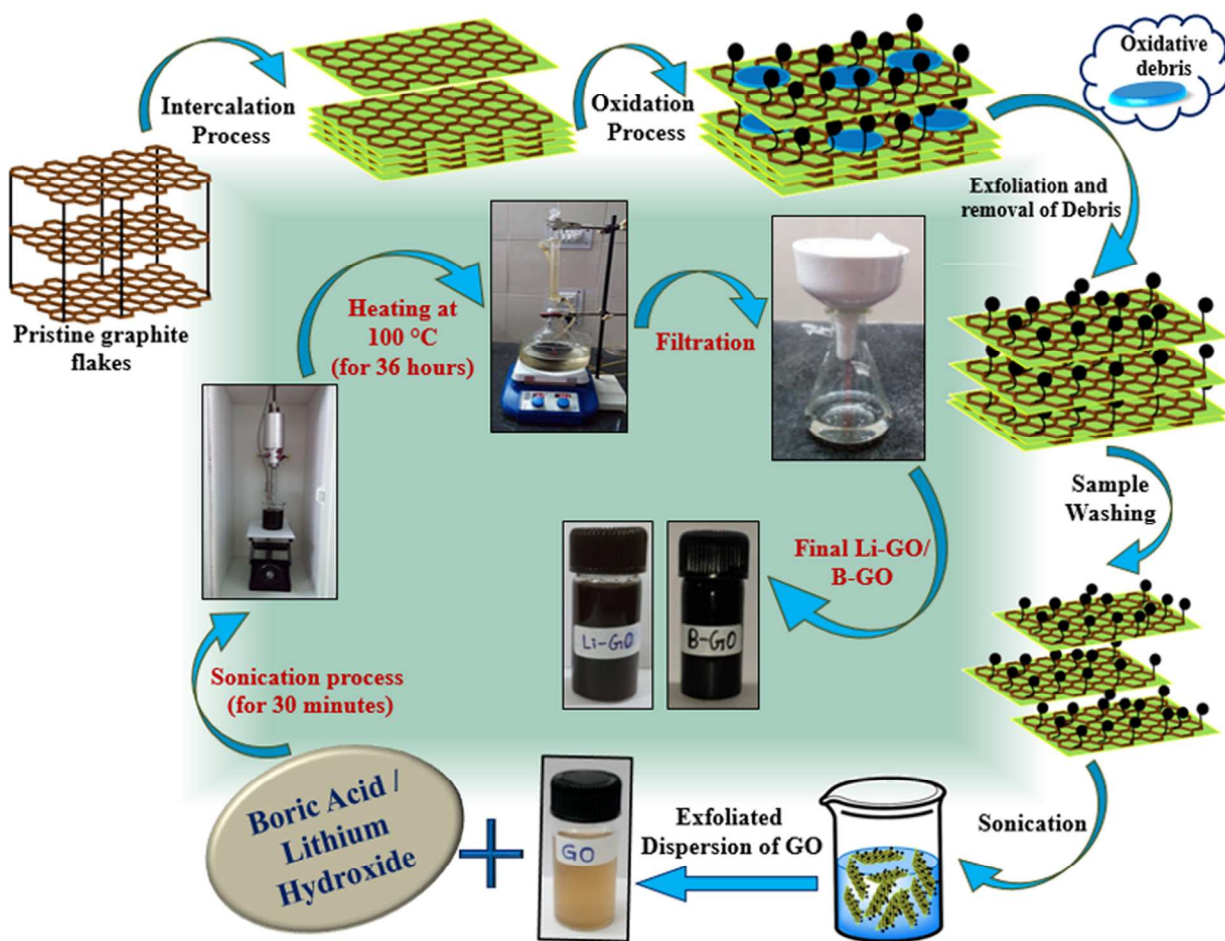

**Figure S1.** Schematic synthesis process of undoped GO, Li-doped GO and B-doped GO

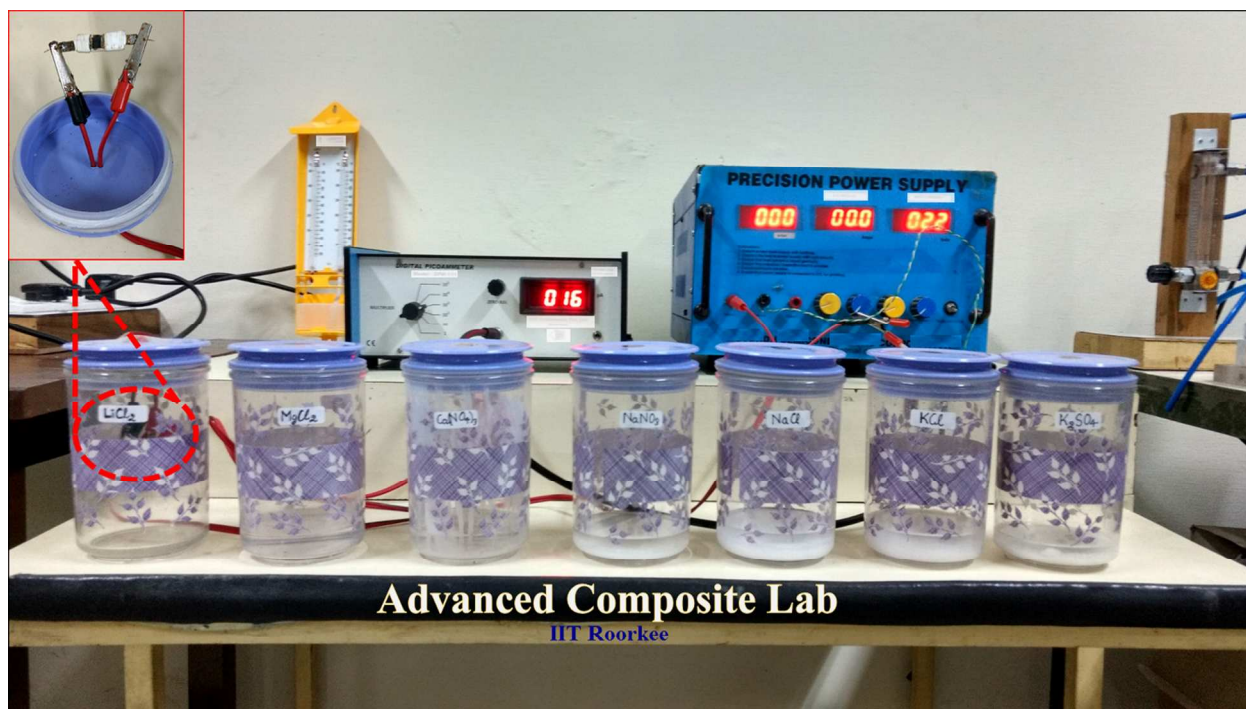

**Figure S2.** Experimental setup for humidity sensing test facility with necessary accessories (inset the fabrication of the sensor)
